# Supplementary material for: Utilising copper screen-printed electrodes (CuSPE) for the electroanalytical sensing of sulfide
Source: Royal Society of Chemistry journal article supplement (doi:10.1039/c5an02469b), 2016-01-01

### Electronic Supporting Information (ESI)

**ESI Figure 1** Optical image of a CuSPE placed in the context of a 2pence coin.

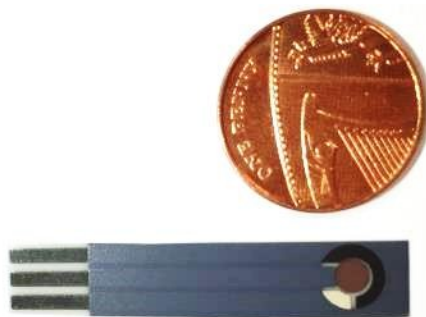

**ESI Figure 2** Scanning electron micrographs of graphitic-SPE (underlying substrate supporting the Cu modification) (A, B) and CuSPE (C, D, E and F).

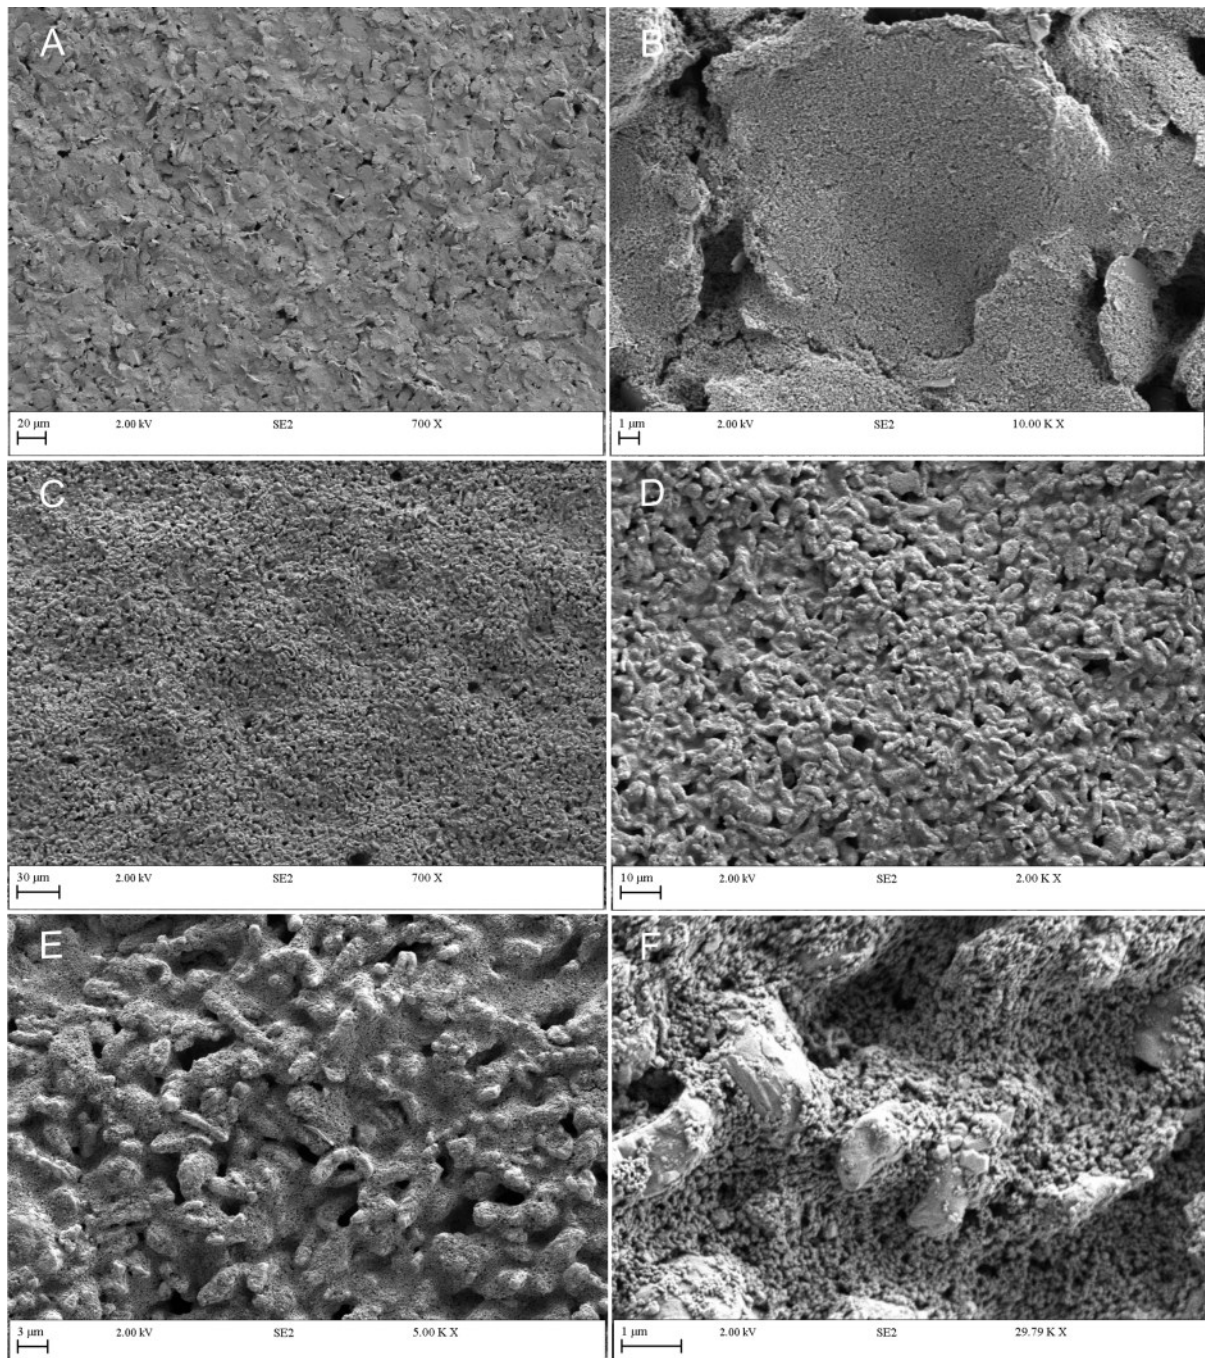

**ESI Figure 3** EDX analysis of a fabricated CuSPE

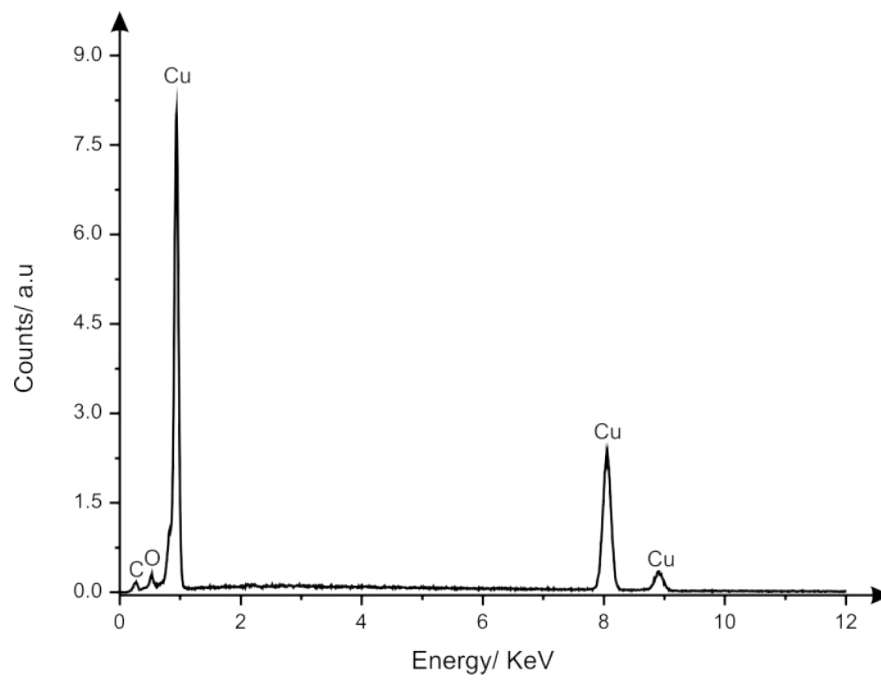

**ESI Figure 4** Linear sweep voltammograms of 1 mM sulfide at CuSPEs in B-R buffer solutions from pH 4 to pH 11. Deposition time 60 s, deposition potential -0.4 V (*vs.* Ag/AgCl) and scan rate 100 mVs<sup>-1</sup>).

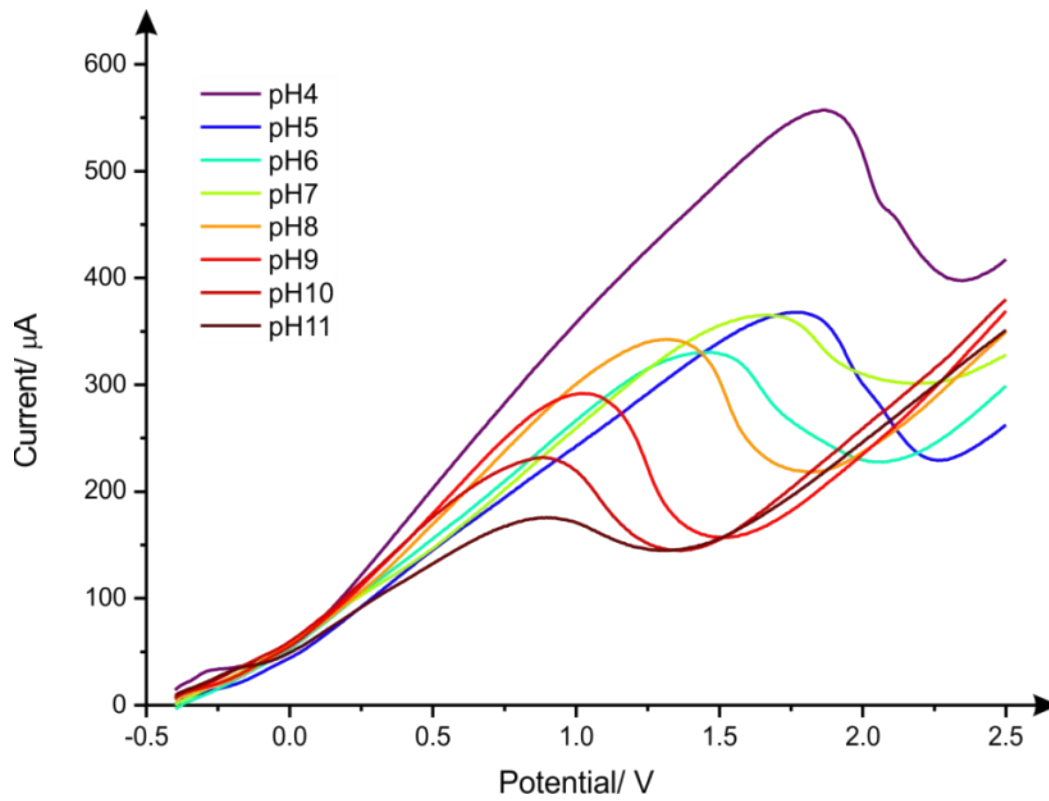

Supplement: c5an02469b1.pdf [file c5an02469b1.pdf]
